# Supplementary material for: Effect of one-lung ventilation on the correlation between left and right cerebral saturation
Source: Springer Nature journal article supplement (doi:10.1186/s12871-023-02001-7), 2023-02-08

**Additional file 1** Overall trend of left and right cerebral tissue oxygenation during anaesthesia

**Additional file 1 legend** Cerebral tissue oxygenation (%) per minute. The mean and SD of the left side are illustrated by the dodger blue line and light blue area, respectively. The mean and SD of the right side are shown by the red line and light red area, respectively. The time points were analysed when  $\geq 10$  patients were included.

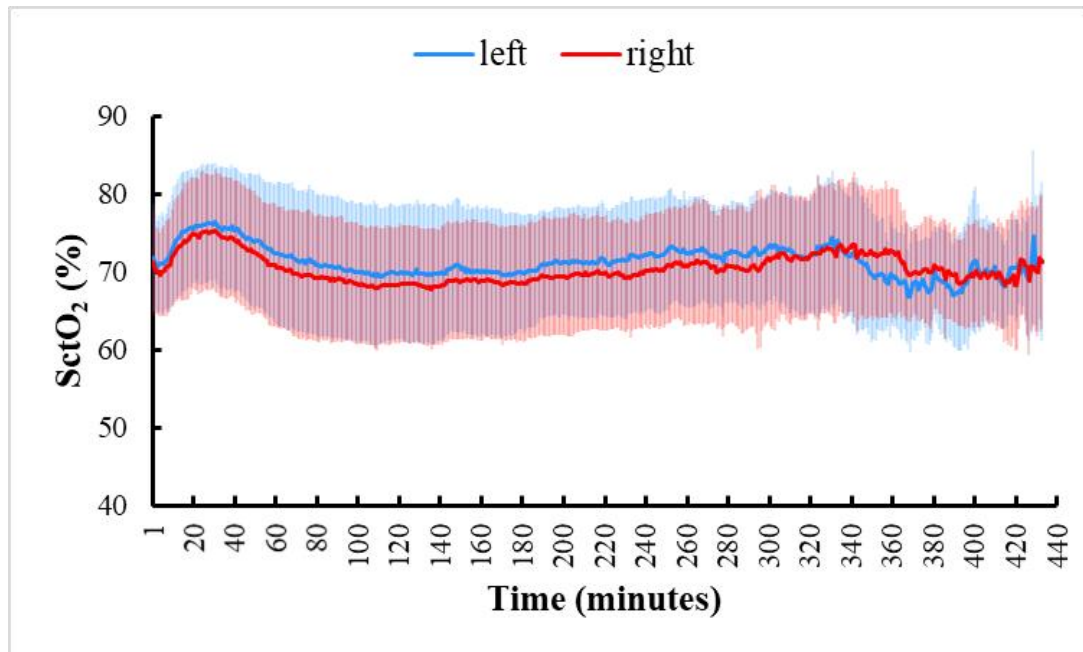

Supplement: MOESM1 [file 24005610]
