# Supplementary material for: Effect of one-lung ventilation on the correlation between left and right cerebral saturation
Source: Springer Nature journal article supplement (doi:10.1186/s12871-023-02001-7), 2023-02-08
Supplement: MOESM2 [file 24005610]

**Additional file 2** A total of 124 patients were included in the analysis for the calculation of Pearson's correlation coefficient and P value during the first 30 minutes after OLV.

| <b>Case number</b> | <b>r</b> | <b>P</b> |
|--------------------|----------|----------|
| 1                  | 0.431    | <0.001   |
| 2                  | 0.778    | <0.001   |
| 3                  | 0.960    | <0.001   |
| 4                  | 0.603    | <0.001   |
| 5                  | 0.943    | <0.001   |
| 6                  | 0.874    | <0.001   |
| 7                  | 0.621    | <0.001   |
| 8                  | 0.219    | <0.001   |
| 9                  | 0.909    | <0.001   |
| 10                 | 0.736    | <0.001   |
| 11                 | 0.842    | <0.001   |
| 12                 | 0.545    | <0.001   |
| 13                 | 0.739    | <0.001   |
| 14                 | 0.697    | <0.001   |
| 15                 | 0.825    | <0.001   |
| 16                 | 0.443    | <0.001   |
| 17                 | 0.592    | <0.001   |
| 18                 | 0.232    | <0.001   |
| 19                 | 0.802    | <0.001   |
| 20                 | 0.513    | <0.001   |
| 21                 | 0.375    | <0.001   |
| 22                 | 0.792    | <0.001   |
| 23                 | -0.189   | <0.001   |
| 24                 | 0.764    | <0.001   |
| 25                 | 0.851    | <0.001   |
| 26                 | 0.837    | <0.001   |
| 27                 | 0.727    | <0.001   |
| 28                 | 0.957    | <0.001   |
| 29                 | 0.860    | <0.001   |
| 30                 | 0.329    | <0.001   |
| 31                 | 0.767    | <0.001   |
| 32                 | 0.658    | <0.001   |
| 33                 | 0.698    | <0.001   |
| 34                 | 0.910    | <0.001   |
| 35                 | 0.954    | <0.001   |
| 36                 | 0.680    | <0.001   |
| 37                 | 0.909    | <0.001   |
| 38                 | 0.517    | <0.001   |
| 39                 | 0.665    | <0.001   |
| 40                 | 0.710    | <0.001   |

|    |        |        |
|----|--------|--------|
| 41 | 0.820  | <0.001 |
| 42 | 0.627  | <0.001 |
| 43 | 0.867  | <0.001 |
| 44 | 0.375  | <0.001 |
| 45 | 0.908  | <0.001 |
| 46 | 0.617  | <0.001 |
| 47 | 0.955  | <0.001 |
| 48 | 0.810  | <0.001 |
| 49 | -0.175 | <0.001 |
| 50 | 0.891  | <0.001 |
| 51 | 0.534  | <0.001 |
| 52 | 0.794  | <0.001 |
| 53 | 0.978  | <0.001 |
| 54 | 0.938  | <0.001 |
| 55 | 0.950  | <0.001 |
| 56 | 0.907  | <0.001 |
| 57 | 0.946  | <0.001 |
| 58 | 0.816  | <0.001 |
| 59 | 0.905  | <0.001 |
| 60 | 0.959  | <0.001 |
| 61 | 0.944  | <0.001 |
| 62 | 0.987  | <0.001 |
| 63 | 0.306  | <0.001 |
| 64 | 0.928  | <0.001 |
| 65 | 0.595  | <0.001 |
| 66 | 0.751  | <0.001 |
| 67 | -0.096 | <0.001 |
| 68 | 0.583  | <0.001 |
| 69 | 0.944  | <0.001 |
| 70 | 0.816  | <0.001 |
| 71 | 0.664  | <0.001 |
| 72 | 0.951  | <0.001 |
| 73 | 0.104  | <0.001 |
| 74 | 0.628  | <0.001 |
| 75 | 0.855  | <0.001 |
| 76 | 0.863  | <0.001 |
| 77 | 0.844  | <0.001 |
| 78 | 0.535  | <0.001 |
| 79 | 0.491  | <0.001 |
| 80 | 0.772  | <0.001 |
| 81 | 0.647  | <0.001 |
| 82 | 0.648  | <0.001 |
| 83 | 0.500  | <0.001 |
| 84 | 0.941  | <0.001 |

|     |        |        |
|-----|--------|--------|
| 85  | 0.984  | <0.001 |
| 86  | 0.211  | <0.001 |
| 87  | 0.929  | <0.001 |
| 88  | 0.702  | <0.001 |
| 89  | 0.962  | <0.001 |
| 90  | -0.827 | <0.001 |
| 91  | 0.560  | <0.001 |
| 92  | 0.149  | <0.001 |
| 93  | 0.831  | <0.001 |
| 94  | -0.493 | <0.001 |
| 95  | 0.975  | <0.001 |
| 96  | 0.901  | <0.001 |
| 97  | 0.973  | <0.001 |
| 98  | 0.812  | <0.001 |
| 99  | 0.798  | <0.001 |
| 100 | 0.499  | <0.001 |
| 101 | 0.846  | <0.001 |
| 102 | 0.963  | <0.001 |
| 103 | -0.157 | <0.001 |
| 104 | 0.797  | <0.001 |
| 105 | 0.943  | <0.001 |
| 106 | 0.859  | <0.001 |
| 107 | 0.969  | <0.001 |
| 108 | 0.918  | <0.001 |
| 109 | 0.916  | <0.001 |
| 110 | 0.909  | <0.001 |
| 111 | 0.158  | <0.001 |
| 112 | 0.429  | <0.001 |
| 113 | 0.914  | <0.001 |
| 114 | 0.699  | <0.001 |
| 115 | -0.075 | <0.001 |
| 116 | 0.238  | <0.001 |
| 117 | 0.816  | <0.001 |
| 118 | 0.977  | <0.001 |
| 119 | 0.976  | <0.001 |
| 120 | 0.935  | <0.001 |
| 121 | 0.868  | <0.001 |
| 122 | 0.926  | <0.001 |
| 123 | 0.888  | <0.001 |
| 124 | 0.923  | <0.001 |

---
